# Supplementary material for: Improving of Rice Blast Resistances in Japonica by Pyramiding Major R Genes
Source: PubMed Central journal article supplement (PMC5206849; doi:10.3389/fpls.2016.01918), 2017-01-03
Supplement: Table_2.pdf [file Table_2.pdf]

**Supplementary Table 2** The chromosome elements from donor genomic in 07GY31

|                          | Chr01       | Chr02       | Chr03     | Chr04       | Chr05 | Chr06       | Chr07 | Chr08       | Chr09 | Chr10 | Chr11       | Chr12     | Genetic background recover rate (%) |
|--------------------------|-------------|-------------|-----------|-------------|-------|-------------|-------|-------------|-------|-------|-------------|-----------|-------------------------------------|
| NIL <sup>Pi27</sup>      | 23.21–25.22 | /           | 4.54–5.43 | 15.21–17.43 | /     | 9.82–12.01  | /     | /           | /     | /     | /           | 3.43–4.25 | 97.82                               |
| NIL <sup>Pi54</sup>      | 9.52–12.34  | 7.23–9.32   | /         | /           | /     | /           | /     | 22.32–25.21 | /     | /     | 23.87–26.01 | /         | 97.33                               |
| NIL <sup>Pi9</sup>       | 34.12–36.17 | 18.32–20.43 | /         | /           | /     | 10.03–12.39 | /     | /           | /     | /     | /           | /         | 98.25                               |
| PPL <sup>Pi27+Pi54</sup> | 23.12–24.23 | /           | 4.76–5.32 | 16.78–17.12 | /     | 10.11–11.29 | /     | /           | /     | /     | 24.98–25.96 | 3.45–4.22 | 98.67                               |
| PPL <sup>Pi9+Pi54</sup>  | 11.50–12.32 | 7.25–8.12   | /         | /           | /     | 10.11–10.51 | /     | 22.72–25.11 | /     | /     | 24.87–25.91 | /         | 98.52                               |

Size: Mb; /: No elements
